# Supplementary material for: Thermodynamic Insights of the Molecular Interactions of Dopamine (Neurotransmitter) with Anionic Surfactant in Non-Aqueous Media
Source: MDPI journal article supplement (doi:10.3390/ph16091187), 2023-08-22
Supplement: s1 [file s1]

## Supporting Information for publication

### Thermodynamic Insights of the Molecular Interactions of Dopamine (Neurotransmitter) with Anionic Surfactant in Non-Aqueous Media

Arshid Nabi <sup>1,\*</sup>, Christopher G. Jesudason, Jamal S. M. Sabir <sup>2,3</sup> and Majid Rasool Kamli <sup>2</sup>,

#### 1. Tables (S1–S3)

**Table S1**

Values of experimental conductivities ( $\kappa^b / \mu S \cdot cm^{-1}$ ) of sodium dodecyl sulfate (SDS) in 0.05 m ( $mol/kg^{-1}$ ) of dopamine hydrochloride (DA) in ethanol (Et-OH) solutions from  $T^c = (298.15$  to  $313.15)$  K at Pressure ( $p$ )<sup>d</sup> = 0.1 MPa.

| $m^a / mol \cdot kg^{-1}$ | $\kappa / mS \cdot cm^{-1}$ |        |        |        |
|---------------------------|-----------------------------|--------|--------|--------|
|                           | 298.15                      | 303.15 | 308.15 | 313.15 |
| 0.001                     | 1.20                        | 1.70   | 2.29   | 3.07   |
| 0.002                     | 3.21                        | 4.08   | 4.76   | 5.55   |
| 0.003                     | 5.55                        | 6.37   | 7.05   | 8.04   |
| 0.004                     | 7.72                        | 8.76   | 9.44   | 10.32  |
| 0.005                     | 9.93                        | 11.07  | 11.83  | 12.71  |
| 0.006                     | 12.00                       | 13.35  | 14.12  | 15.08  |
| 0.007                     | 14.22                       | 15.64  | 16.59  | 17.46  |
| 0.008                     | 16.50                       | 17.93  | 18.97  | 19.73  |
| 0.009                     | 17.55                       | 19.17  | 20.58  | 21.53  |
| 0.010                     | 18.59                       | 20.11  | 21.44  | 22.78  |
| 0.011                     | 19.55                       | 21.09  | 22.50  | 23.74  |
| 0.012                     | 20.29                       | 22.05  | 23.39  | 24.91  |

<sup>a</sup>m is the molality of SDS in (ethanol + DA) system.

Standard uncertainties,  $u$ , are  $u(T)^c = \pm 0.01$  K,  $u(p)^d = \pm 0.002$  MPa, and  $u_r(\kappa)^b = \pm 0.015$   $mS \cdot cm^{-1}$  (level of confidence = 0.68).

**Table S2**

Values of experimental densities ( $\rho^b/\text{g cm}^{-3}$ ) of sodium dodecyl sulfate (SDS) in 0.05 m (mol/kg<sup>-1</sup>) of dopamine hydrochloride (DA) in ethanol (Et-OH) solutions from  $u(T)^c = (298.15 \text{ to } 313.15) \text{ K}$  at Pressure ( $p$ )<sup>d</sup> = 0.1 MPa.

| $m_T^a / \text{mol} \cdot \text{kg}^{-1}$ | $\rho / \text{g cm}^{-3}$ |        |        |        |
|-------------------------------------------|---------------------------|--------|--------|--------|
|                                           | 298.15                    | 303.15 | 308.15 | 313.15 |
| 0.001                                     | 0.7978                    | 0.7972 | 0.7965 | 0.7957 |
| 0.002                                     | 0.7972                    | 0.7965 | 0.7957 | 0.7949 |
| 0.003                                     | 0.7965                    | 0.7958 | 0.7948 | 0.7938 |
| 0.004                                     | 0.7959                    | 0.7950 | 0.7940 | 0.7929 |
| 0.005                                     | 0.7952                    | 0.7943 | 0.7931 | 0.7920 |
| 0.006                                     | 0.7944                    | 0.7934 | 0.7922 | 0.7910 |
| 0.007                                     | 0.7937                    | 0.7927 | 0.7913 | 0.7901 |
| 0.008                                     | 0.7930                    | 0.7919 | 0.7905 | 0.7890 |
| 0.009                                     | 0.7913                    | 0.7902 | 0.7887 | 0.7877 |
| 0.010                                     | 0.7894                    | 0.7880 | 0.7867 | 0.7852 |
| 0.011                                     | 0.7873                    | 0.7859 | 0.7844 | 0.7830 |
| 0.012                                     | 0.7852                    | 0.7838 | 0.7823 | 0.7807 |

<sup>a</sup>m is the molality of SDS in (ethanol + DA) system.

Standard uncertainties,  $u$ , are  $u(T)^c = \pm 0.01 \text{ K}$ ,  $u(p)^d = \pm 0.002 \text{ MPa}$ , and  $u_r(\rho)^b = \pm 0.001 \text{ g} \cdot \text{cm}^{-3}$  (level of confidence = 0.68).

**Table S3**

Values of experimental surface tension ( $\gamma^b$ / mN.m<sup>-1</sup>) of sodium dodecyl sulfate (SDS) in 0.05 m (mol/kg<sup>-1</sup>) of dopamine hydrochloride (DA) in ethanol (Et-OH) solutions from  $T^c = (298.15$  to  $313.15)$  K at Pressure ( $p$ )<sup>d</sup> = 0.1 MPa.

| $\gamma$ / mN.m <sup>-1</sup>  |       |       |       |       |
|--------------------------------|-------|-------|-------|-------|
| $m_T^a$ / mol.kg <sup>-1</sup> |       |       |       |       |
| 0.001                          | 39.63 | 38.21 | 36.75 | 35.13 |
| 0.002                          | 37.28 | 36.00 | 34.46 | 33.29 |
| 0.003                          | 35.23 | 33.88 | 32.54 | 31.06 |
| 0.004                          | 33.08 | 31.91 | 30.65 | 29.41 |
| 0.005                          | 30.98 | 29.63 | 28.64 | 27.67 |
| 0.006                          | 28.83 | 27.61 | 26.62 | 25.51 |
| 0.007                          | 26.71 | 25.54 | 24.60 | 23.71 |
| 0.008                          | 24.46 | 23.48 | 22.74 | 21.94 |
| 0.009                          | 23.46 | 22.43 | 21.46 | 20.60 |
| 0.010                          | 22.67 | 21.93 | 20.90 | 20.17 |
| 0.011                          | 21.98 | 21.29 | 20.62 | 19.94 |
| 0.012                          | 21.55 | 20.86 | 20.09 | 19.57 |

<sup>a</sup>m is the molality of SDS in (ethanol + DA) system.

Standard uncertainties,  $u$ , are  $u(T)^c = \pm 0.01$  K,  $u(p)^d = \pm 0.002$  MPa, and  $u_r(\gamma)^b = \pm 0.3$  mN.m<sup>-1</sup> (level of confidence = 0.68).
